# Supplementary material for: Mutations within the cGMP-binding domain of CNGA1 causing autosomal recessive retinitis pigmentosa in human and animal model
Source: Springer Nature journal article supplement (doi:10.1038/s41420-022-01185-0), 2022-09-17

## Central Lancashire Online Knowledge (CLoK)

|          |                                                                                                                                                                                                                                                                                                                                                                                                                         |
|----------|-------------------------------------------------------------------------------------------------------------------------------------------------------------------------------------------------------------------------------------------------------------------------------------------------------------------------------------------------------------------------------------------------------------------------|
| Title    | Mutations within the cGMP-binding domain of CNGA1 causing autosomal recessive retinitis pigmentosa in human and animal model                                                                                                                                                                                                                                                                                            |
| Type     | Article                                                                                                                                                                                                                                                                                                                                                                                                                 |
| URL      | <a href="https://clock.uclan.ac.uk/43948/">https://clock.uclan.ac.uk/43948/</a>                                                                                                                                                                                                                                                                                                                                         |
| DOI      | ##doi##                                                                                                                                                                                                                                                                                                                                                                                                                 |
| Date     | 2022                                                                                                                                                                                                                                                                                                                                                                                                                    |
| Citation | Kandaswamy, Surabhi orcid iconORCID: 0000-0002-6336-1722, Zobel, Lena, John, Bina, Santhiya, Sathiyavedu Thyagarajan, Bogedein, Jacqueline, Przemeck, Gerhard K. H., Gailus-Durner, Valérie, Fuchs, Helmut, Biel, Martin et al (2022) Mutations within the cGMP-binding domain of CNGA1 causing autosomal recessive retinitis pigmentosa in human and animal model. <i>Cell Death Discovery</i> , 8 (1). ISSN 2058-7716 |
| Creators | Kandaswamy, Surabhi, Zobel, Lena, John, Bina, Santhiya, Sathiyavedu Thyagarajan, Bogedein, Jacqueline, Przemeck, Gerhard K. H., Gailus-Durner, Valérie, Fuchs, Helmut, Biel, Martin, de Angelis, Martin Hrabě, Graw, Jochen, Michalakakis, Stylianos and Amarie, Oana Veronica                                                                                                                                          |

It is advisable to refer to the publisher's version if you intend to cite from the work. ##doi##

For information about Research at UCLan please go to <http://www.uclan.ac.uk/research/>

All outputs in CLoK are protected by Intellectual Property Rights law, including Copyright law. Copyright, IPR and Moral Rights for the works on this site are retained by the individual authors and/or other copyright owners. Terms and conditions for use of this material are defined in the <http://clock.uclan.ac.uk/policies/>

## Sup-Fig2

### WB

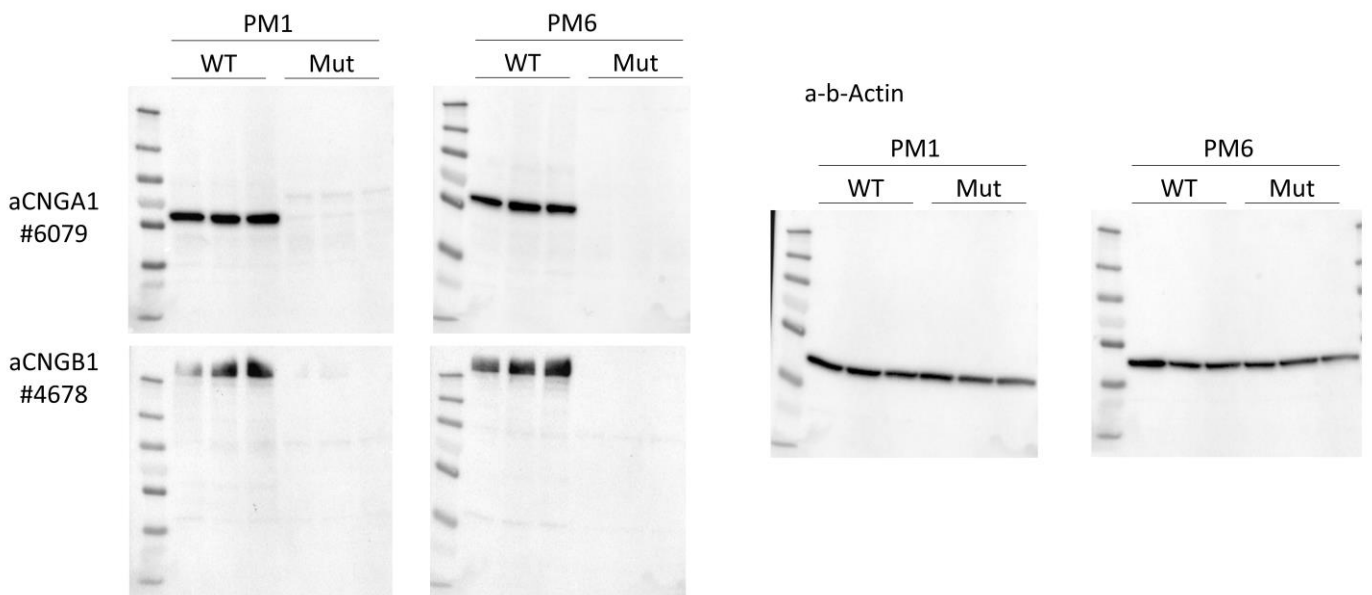

Supplement: MOESM4 [file 41420_2022_1185_MOESM4_ESM.pdf]
