# Supplementary material for: Mutations within the cGMP-binding domain of CNGA1 causing autosomal recessive retinitis pigmentosa in human and animal model
Source: PubMed Central journal article supplement (PMC9482621; doi:10.1038/s41420-022-01185-0), 2022-09-17

## Sup-Fig2

### WB

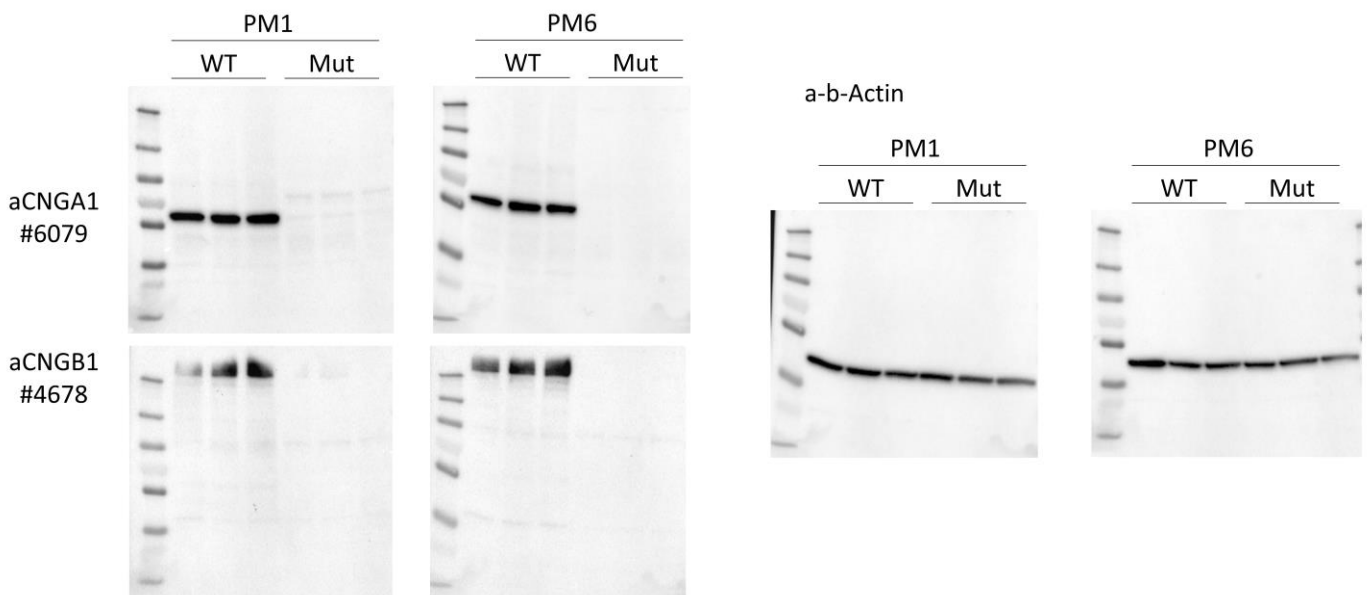

Supplement: 41420_2022_1185_MOESM4_ESM.pdf [file 41420_2022_1185_MOESM4_ESM.pdf]
